# Supplementary material for: CdS/TiO2 nanostructures synthesized via the SILAR method for enhanced photocatalytic glucose conversion and simultaneous hydrogen production under UV and simulated solar irradiation
Source: Royal Society of Chemistry journal article supplement (doi:10.1039/d3cy00225j), 2023-01-01
Supplement: d3cy00225j1.pdf [file d3cy00225j1.pdf]

# **CdS/TiO<sub>2</sub> Nanostructures Synthesized via SILAR Method for Enhanced Photocatalytic Glucose Conversion and Simultaneous Hydrogen Production under UV and Simulated Solar Irradiations**

*Kamonchanok Roongraung,<sup>a,b</sup> Alexey Cherevan,<sup>c</sup> Dominik Eder,<sup>c</sup> and  
Surawut Chuangchote<sup>a,b,\*</sup>*

*<sup>a</sup> Department of Tool and Materials Engineering, Faculty of Engineering, King Mongkut's University of Technology Thonburi (KMUTT), 126 Prachauthit Rd., Bangmod, Thungkru, Bangkok 10140, Thailand.*

*<sup>b</sup> Research Center for Advanced Materials for Energy and Environmental Technology (MEET), King Mongkut's University of Technology Thonburi (KMUTT), 126 Prachauthit Rd., Bangmod, Thungkru, Bangkok 10140, Thailand.*

*<sup>c</sup> Institute of Materials Chemistry, Technische Universität Wien (TU Wien), Getreidemarkt 9, Vienna 1060, Austria*

*E-mail: surawut.chu@kmutt.ac.th*

The thermogravimetric (TGA) measurement was carried out on a TGA Q5000 (TA Instruments) for indicating the weight loss as a function of temperature. The TGA curve was recorded under air at temperature ramp from 30 to 1000 °C with the heating ramp of 5 °C min<sup>-1</sup>. Figure S1 show the TGA curve of anatase TiO<sub>2</sub>, 20CdS/TiO<sub>2</sub>, CdS nanoparticles. The weight losses below 200 °C were attributed to the loss of absorbed water on surface of nanocomposites. A temperature range of 200-300 °C, it shows no big loss difference with a decrease of weight of 6% so it was attributed to reduce organic compound. But comparing between 20CdS/TiO<sub>2</sub> and CdS, it can observe that the mass increase at temperature range of 300-700 °C corresponding to the increase in CdS mass. It is an indication of the formation of cadmium sulfate (CdSO<sub>4</sub>) through the following reaction (equation 1). The weight loss between 750-1000 °C could be attributed to the decomposition of CdSO<sub>4</sub>.

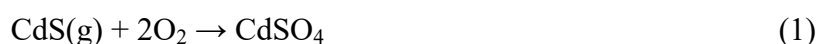

According the TGA result, it could be confirmed that the suitable calcination condition (200°C) which determine in this work not effect to the formation of CdS.

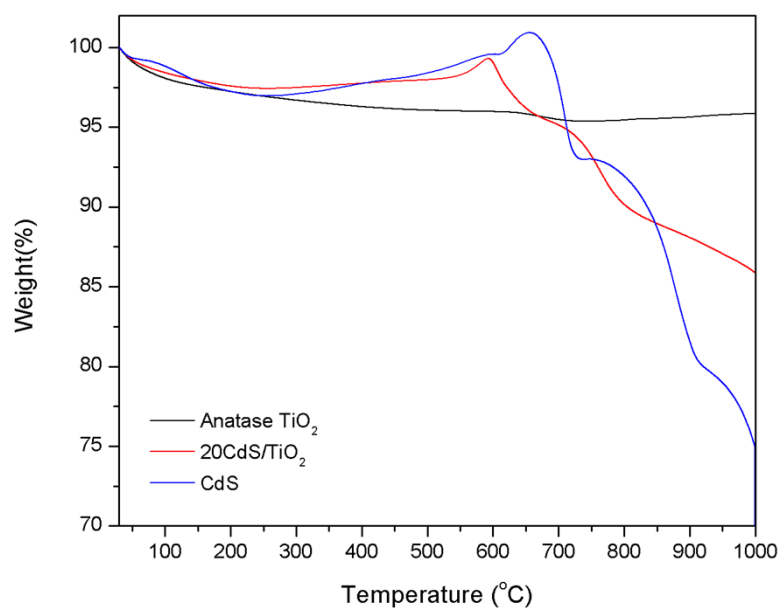

**Fig. S1** TGA curve of anatase  $\text{TiO}_2$  NPs, 20 CdS/ $\text{TiO}_2$  NPs, CdS NP

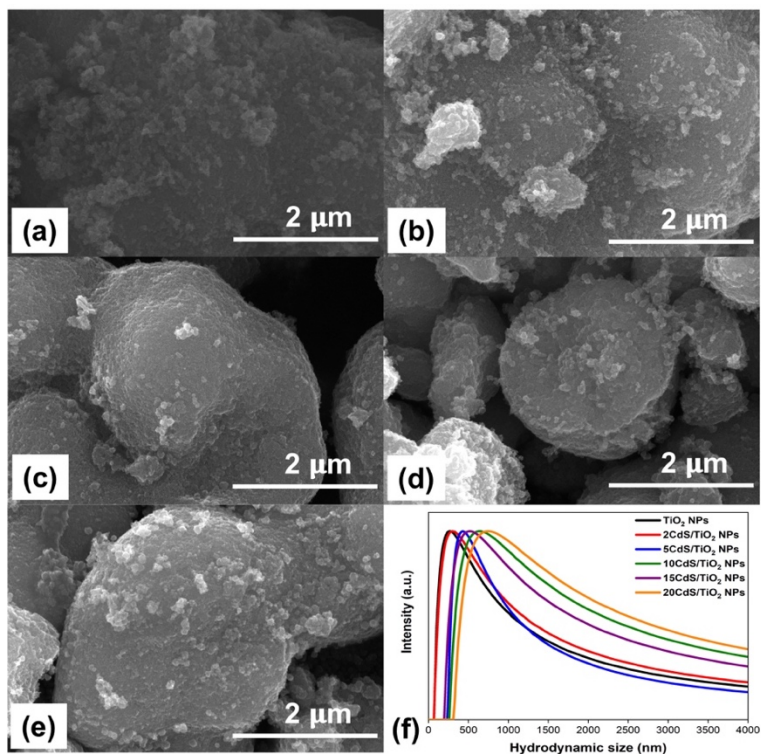

**Fig. S2** SEM image of (a) 2CdS/ $\text{TiO}_2$  NPs, (b) 5CdS/ $\text{TiO}_2$  NPs, (c) 10CdS/ $\text{TiO}_2$  NPs, (d) 15CdS/ $\text{TiO}_2$  NPs, (e) 20CdS/ $\text{TiO}_2$  NPs at magnification of 80k (scale bar = 2  $\mu\text{m}$ ), and (f) DLS particle size distribution of samples.

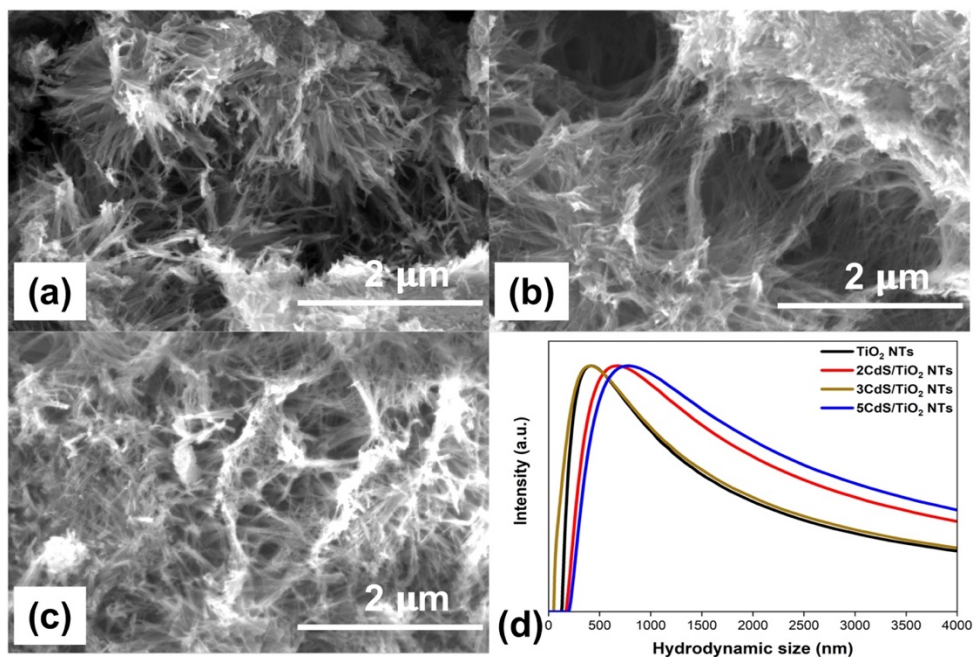

**Fig. S3** SEM image of (a) 2CdS/TiO<sub>2</sub> NPs, (b) 3CdS/TiO<sub>2</sub> NPs, (c) 5CdS/TiO<sub>2</sub> NPs at magnification of 80k (scale bar = 2 μm), and (d) DLS diameter size distribution of samples.

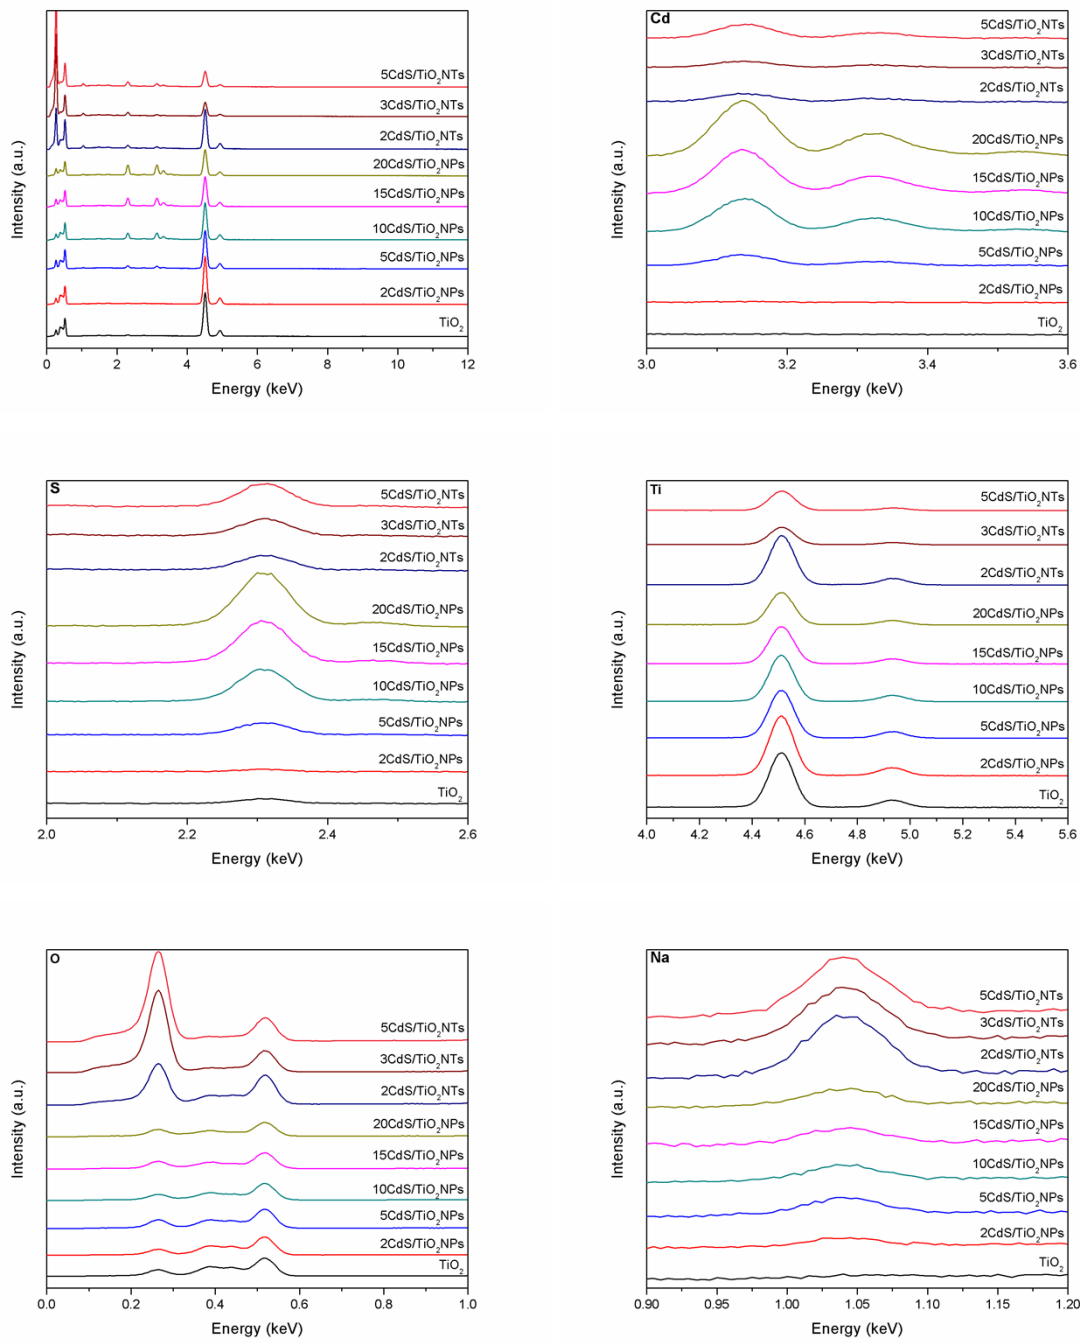

**Fig. S4** EDX spectra of TiO<sub>2</sub> NPs, TiO<sub>2</sub> NTs, CdS/ TiO<sub>2</sub> NPs, CdS/TiO<sub>2</sub> NTs with different CdS cycle.

**Table S1.** The energy band-gap of TiO<sub>2</sub> NPs, TiO<sub>2</sub> NTs, CdS/TiO<sub>2</sub> NPs, and CdS/TiO<sub>2</sub> NTs with different CdS cycles.

| <b>Photocatalyst</b>       | <b>Band gap (eV)</b> |
|----------------------------|----------------------|
| TiO <sub>2</sub> NPs       | 3.15                 |
| 1CdS/TiO <sub>2</sub> NPs  | 3.18                 |
| 2CdS/TiO <sub>2</sub> NPs  | 3.15                 |
| 3CdS/TiO <sub>2</sub> NPs  | 3.00                 |
| 5CdS/TiO <sub>2</sub> NPs  | 2.36                 |
| 10CdS/TiO <sub>2</sub> NPs | 2.22                 |
| 15CdS/TiO <sub>2</sub> NPs | 2.10                 |
| 20CdS/TiO <sub>2</sub> NPs | 2.00                 |
| TiO <sub>2</sub> NTs       | 3.11                 |
| 1CdS/TiO <sub>2</sub> NTs  | 3.19                 |
| 2CdS/TiO <sub>2</sub> NTs  | 2.40                 |
| 3CdS/TiO <sub>2</sub> NTs  | 2.38                 |
| 5CdS/TiO <sub>2</sub> NTs  | 2.22                 |

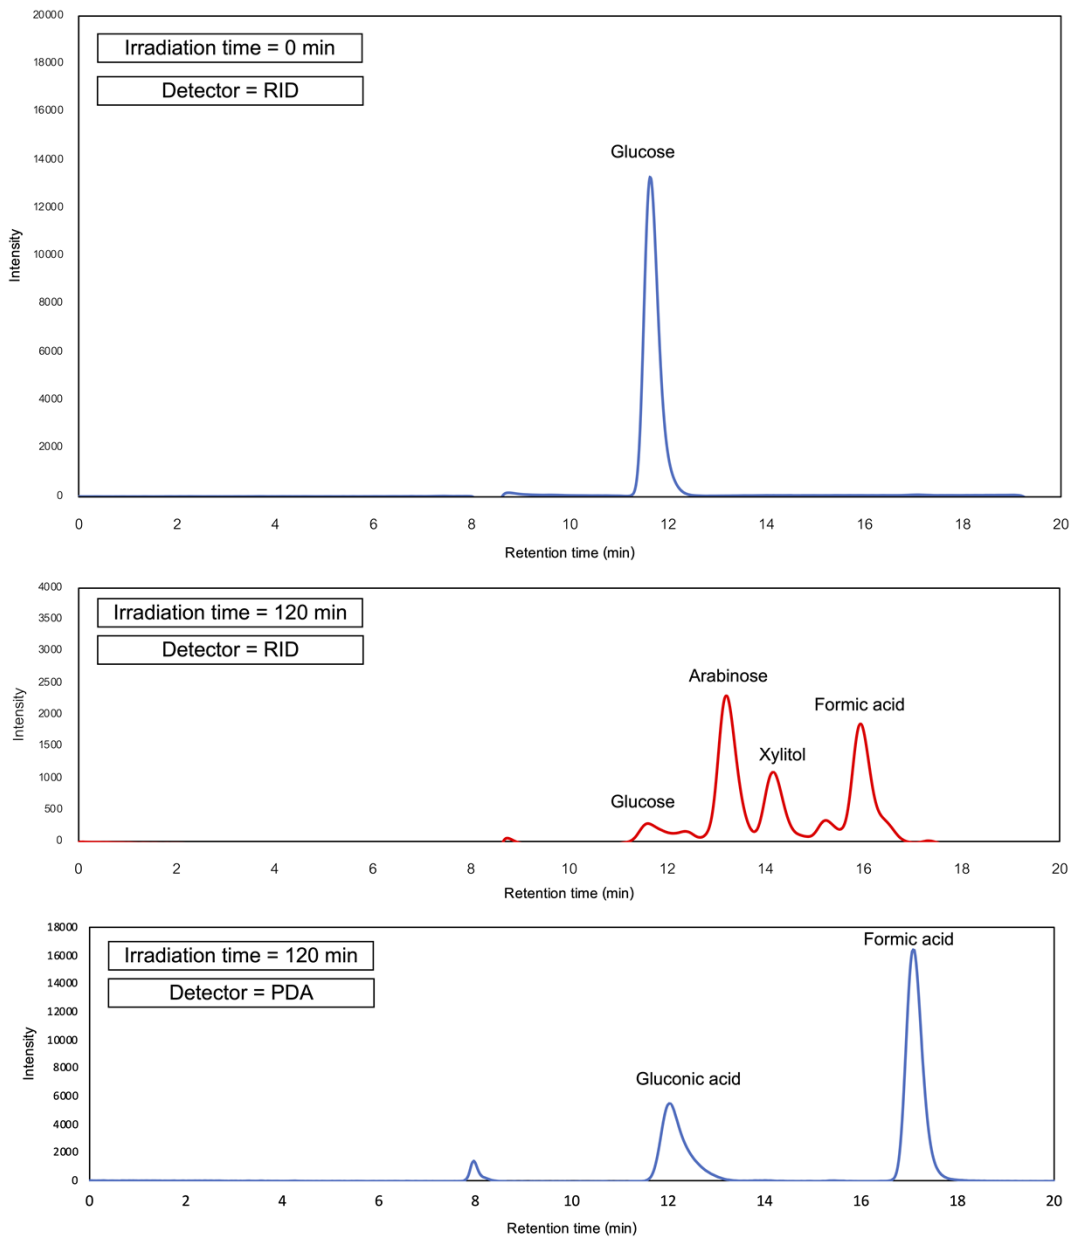

**Fig. S5** HPLC chromatogram of products from photocatalytic glucose conversion.

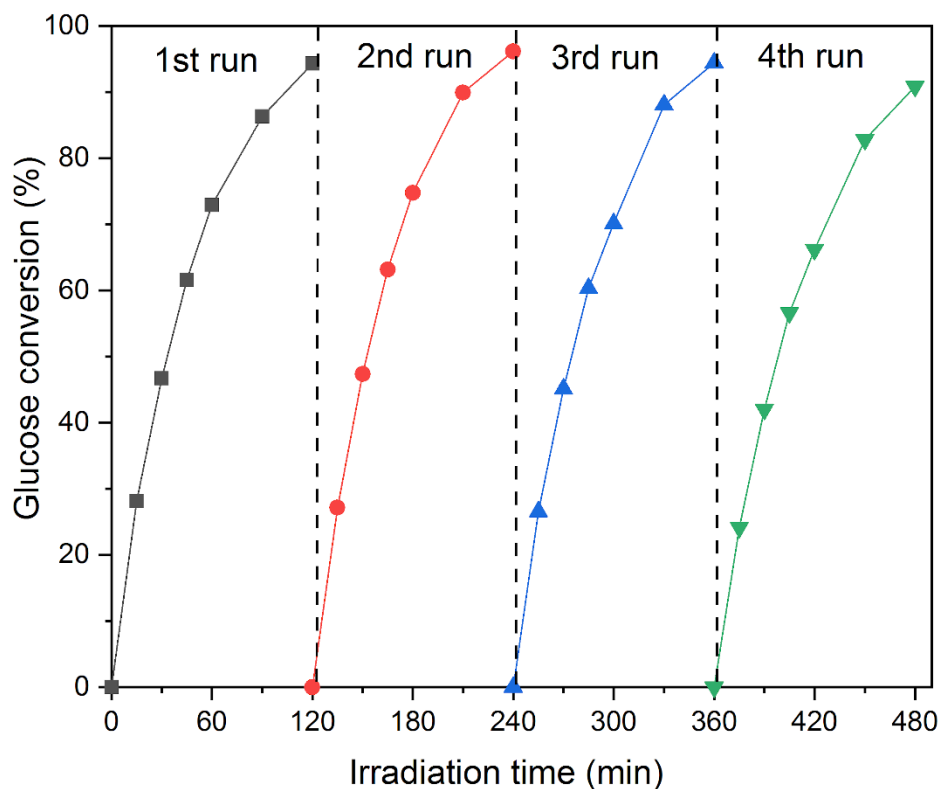

**Fig. S6** Stability and recycle of 1CdS/TiO<sub>2</sub> nanotubes for four consecutive cycles.

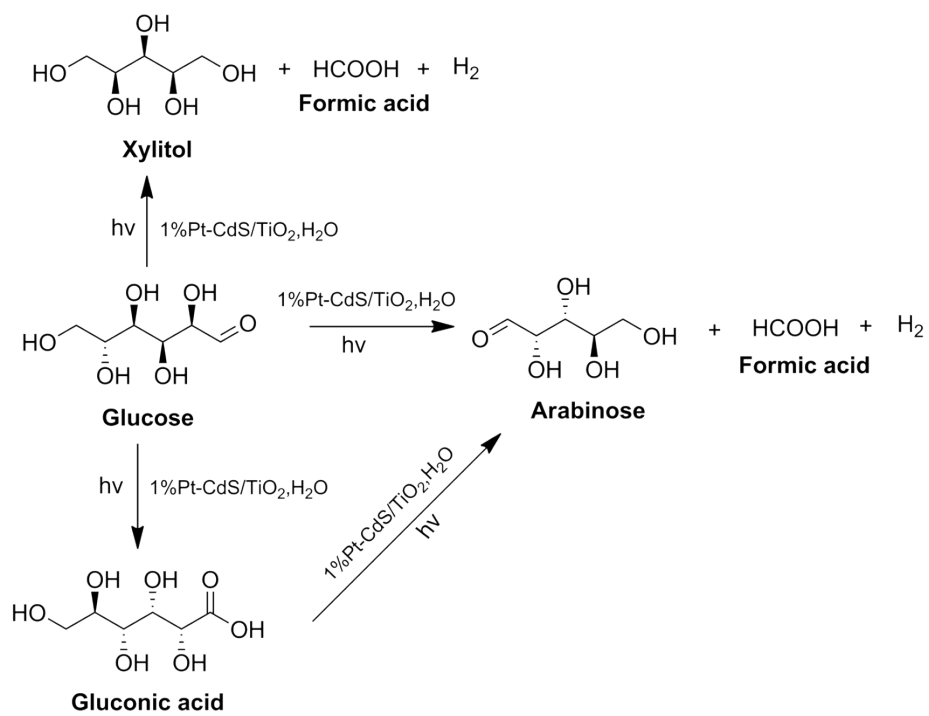

**Fig. S7** The possible reaction routes for glucose conversion.
